# Supplementary material for: Simultaneous CO2 reduction and NADH regeneration using formate and glycerol dehydrogenase enzymes co-immobilized on modified natural zeolite
Source: Royal Society of Chemistry journal article supplement (doi:10.1039/d2ra03459j), 2022-01-01
Supplement: d2ra03459j1.pdf [file d2ra03459j1.pdf]

## ARTICLE

### Simultaneous CO<sub>2</sub> reduction and NADH regeneration using formate and glycerol dehydrogenase enzymes co-immobilized on modified natural zeolite

Received 00th January 20xx,  
Accepted 00th January 20xx

Clarissa Cocuzza<sup>a</sup>, Giuseppe Pietricola<sup>a</sup>, Ilaria Zonca<sup>a</sup>, Melodj Dosa<sup>a</sup>, Oscar Romero<sup>c</sup>, Tonia Tommasi<sup>a</sup>, Valentina Cauda<sup>a</sup>, Debora Fino<sup>a</sup>, Carminna Ottone<sup>†b</sup> and Marco Piumetti<sup>\*a</sup>

DOI: 10.1039/x0xx00000x

<sup>a</sup> Department of Applied Science and Technology, Corso Duca degli Abruzzi 24, Politecnico di Torino, I-10129 Turin, Italy.

<sup>b</sup> Escuela de Ingeniería Bioquímica, Pontificia Universidad Católica de Valparaíso, Av. Brasil 2085, Valparaíso, Chile.

<sup>c</sup> Bioprocess Engineering and Applied Biocatalysis Group, Department of Chemical, Biological and Environmental Engineering, Universitat Autònoma de Barcelona, 08193.

\*: corresponding author. Tel. +39 011 0904753; E-mail address: [marco.piumetti@polito.it](mailto:marco.piumetti@polito.it)

†: corresponding author. Tel. +56 32 2372018; E-mail address: [carminna.ottone@pucv.cl](mailto:carminna.ottone@pucv.cl)

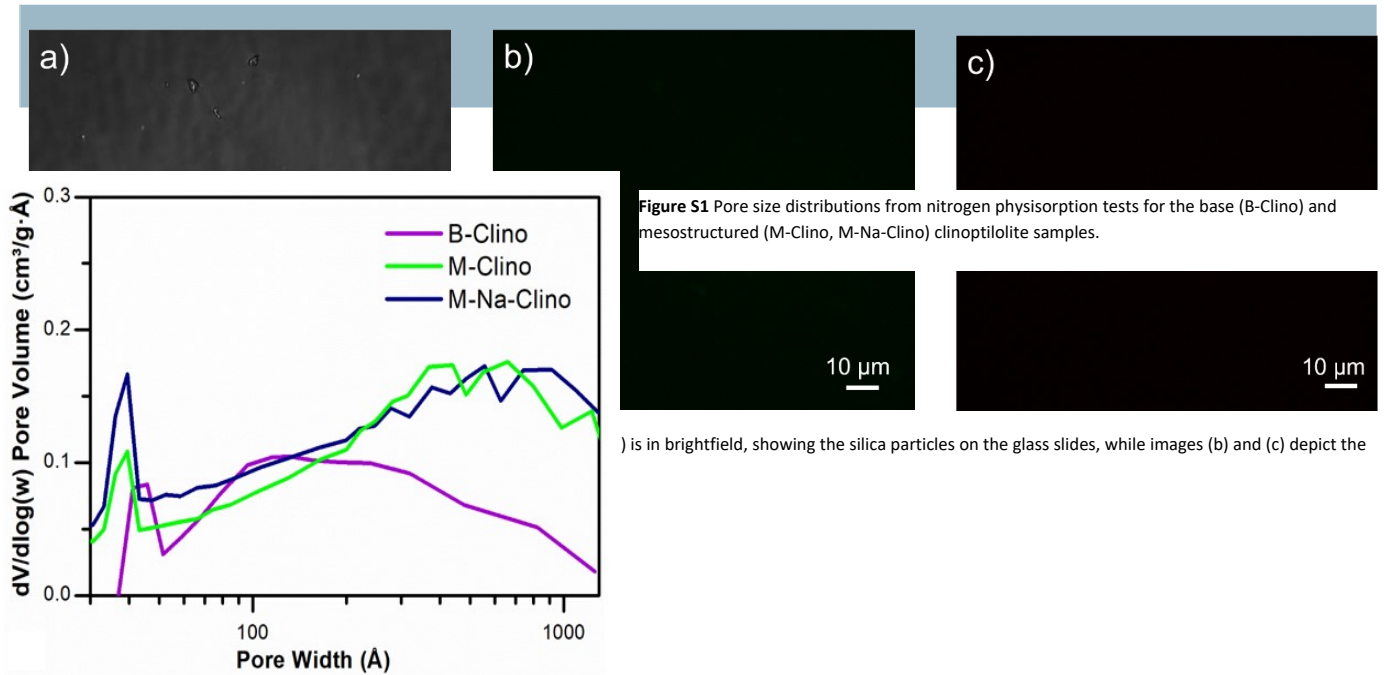

(a) is in brightfield, showing the silica particles on the glass slides, while images (b) and (c) depict the

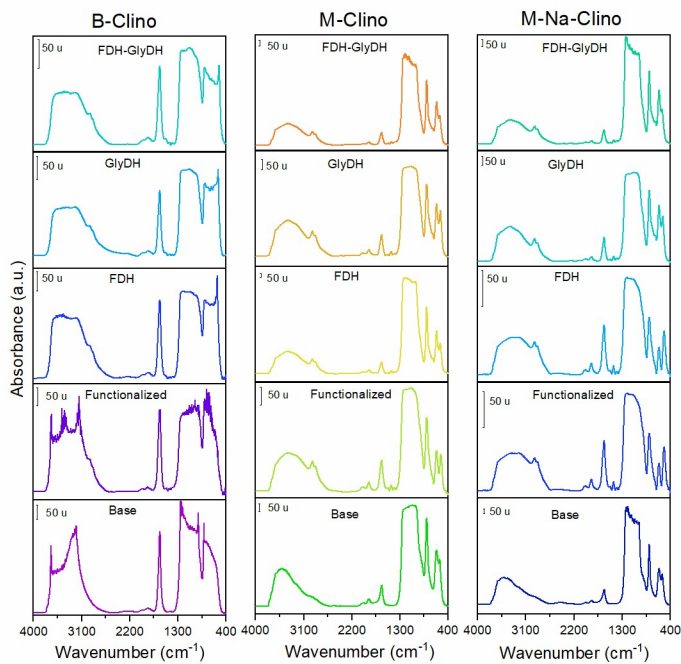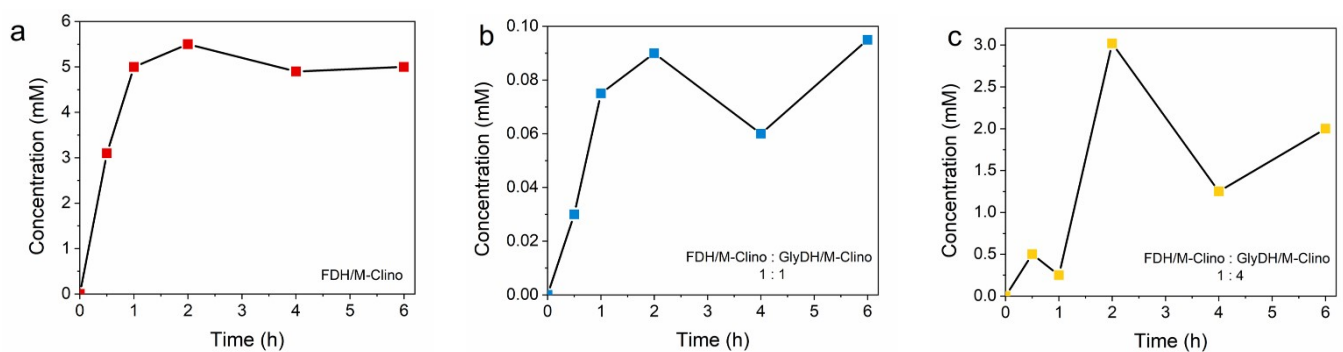

**Figure S4** Variation of concentration of formic acid over time due to the reduction of  $\text{CO}_2$  by FDH,  $\text{NAD}^+$  10 mM dissolved in the initial solution (a) FDH:GlyDH 1:1 ratio  $\text{NAD}^+$  10 mM dissolved in the initial solution (b) FDH:GlyDH 1:4 ratio  $\text{NAD}^+$  10 mM dissolved in the initial solution (c).
